# Supplementary material
Source: publisher figshare collection journal article supplement (https://sage.figshare.com/ndownloader/files/14507363)
Supplement: Supplementary file 1 [file 14507363]

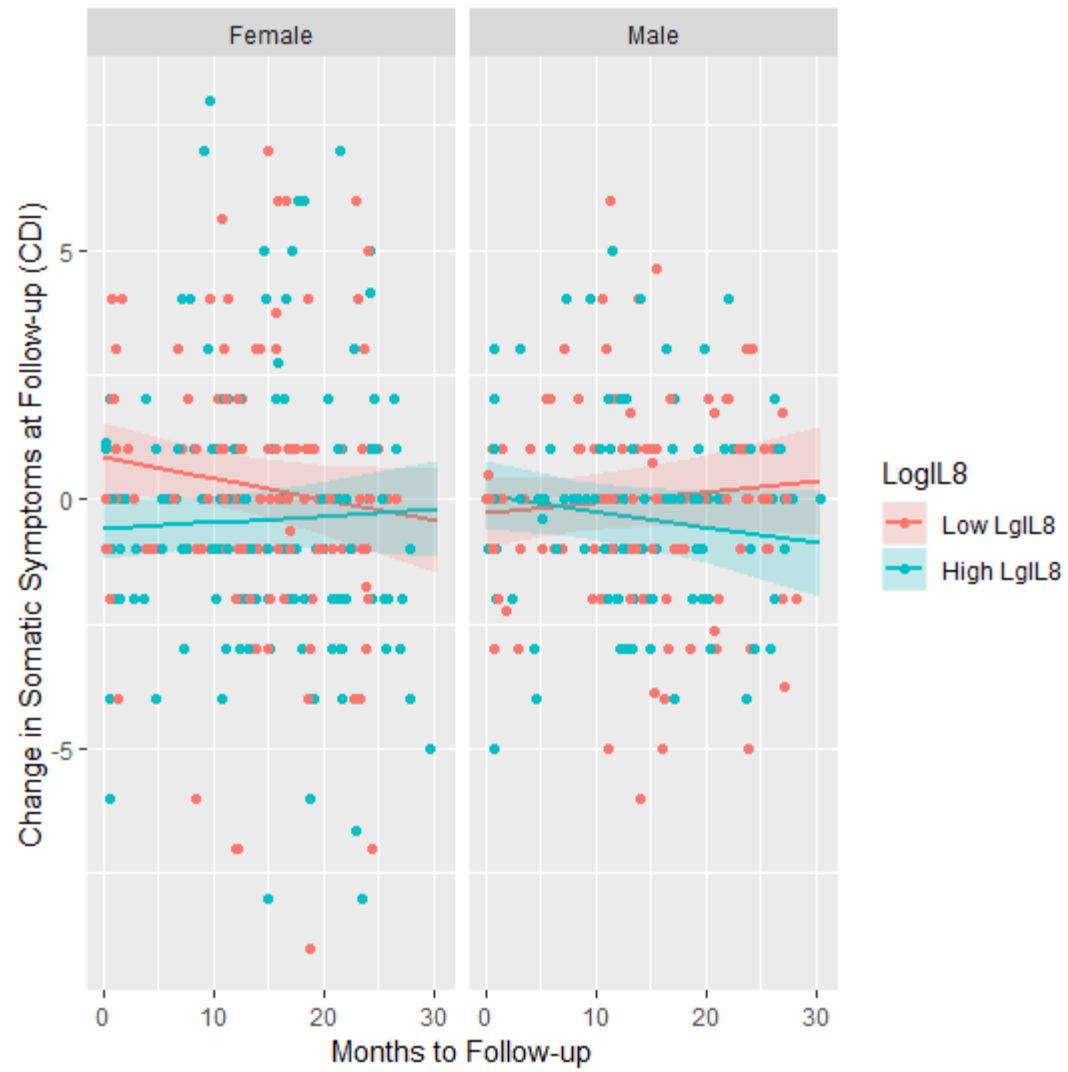

*Supplemental Figure 1.* Log IL-8 predicts change in somatic symptoms differentially by sex and months-to-follow-up

Note: IL = interleukin.
